# Supplementary material
Source: PubMed Central journal article supplement (PMC2716375)

**Supplementary Fig. 1: Flow chart diagram illustrating the creation of UGIT from Entrez Gene and UniGene files**

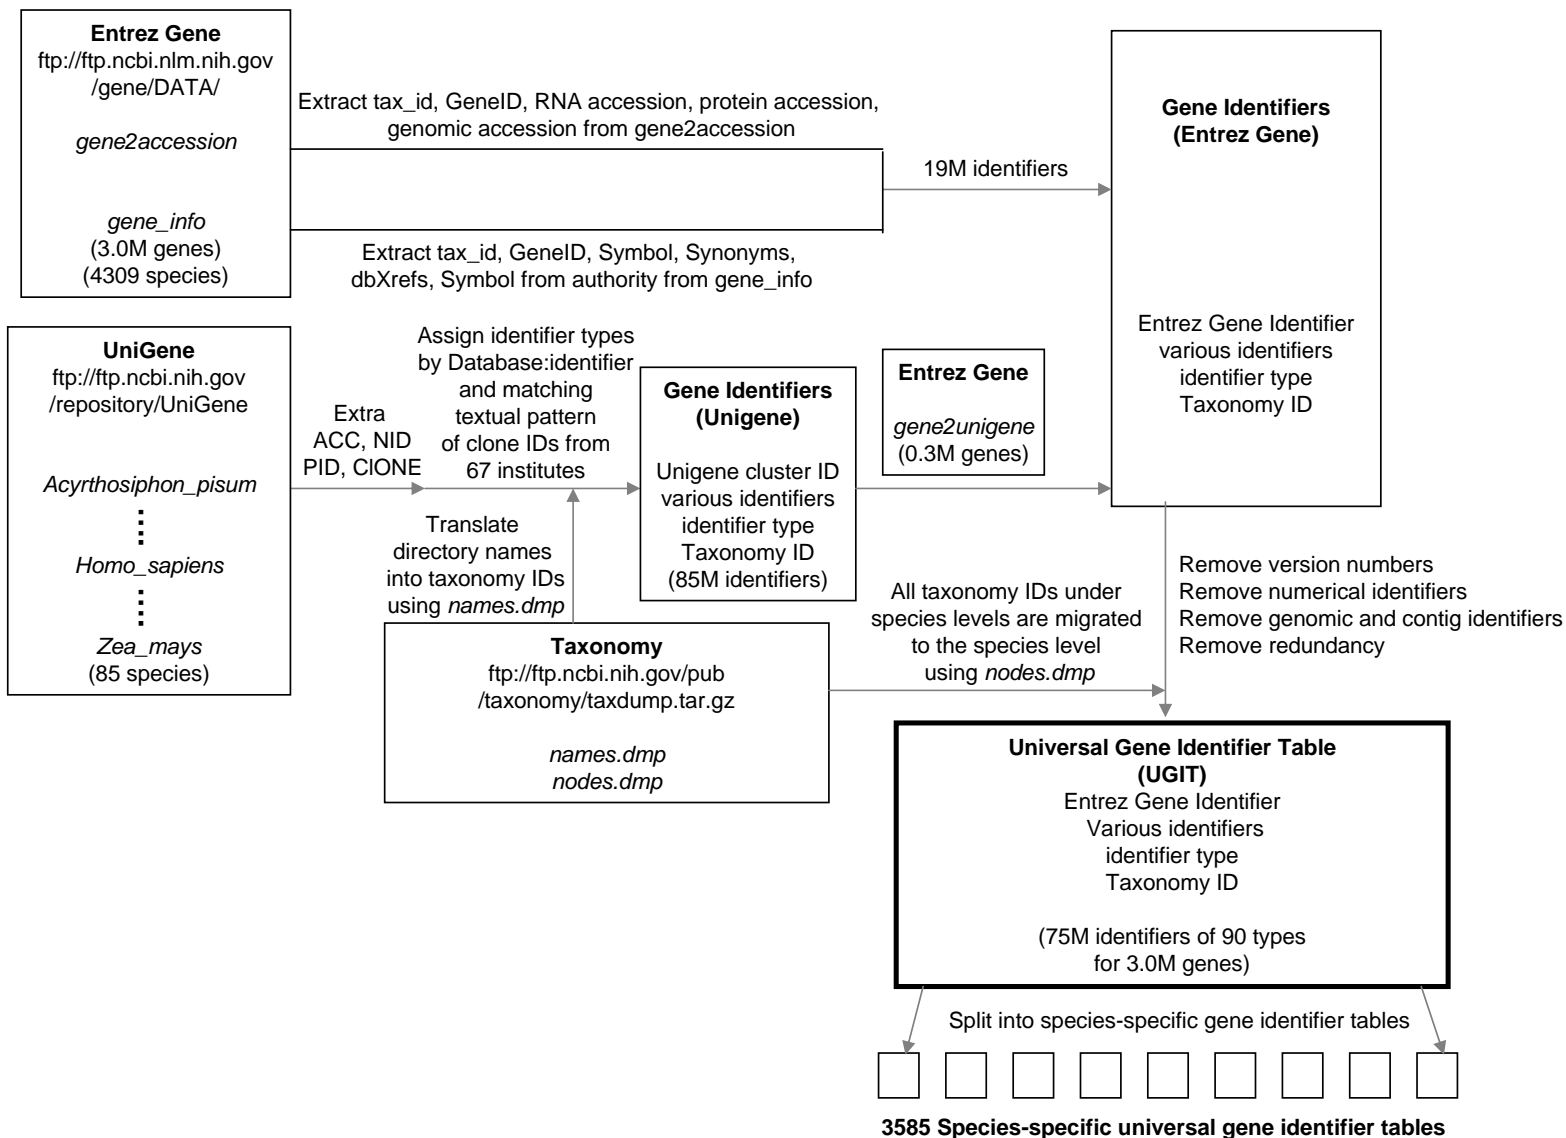

Supplement: NIHMS59171-supplement-Figure.pdf [file NIHMS59171-supplement-Figure.pdf]
